# Supplementary material
Source: publisher site journal article supplement (https://www.dovepress.com/get_supplementary_file.php?f=323268.docx)
Supplement: Supplementary file 1 [file get_supplementary_file.php]

KAP of emergency physicians in Kingdom of Bahrain:

**Supplementary Figure 1: Self designed COVID-19 Questionnaire**

Dear colleagues,

The Novel Corona virus disease 2019 (COVID-19) is a global health emergency and was declared as a Pandemic by the World Health Organization (WHO) on the 12th of March 2020,

You are being invited to participate in a research study titled “Knowledge, attitude and practices of Emergency Physicians in the kingdom of Bahrain toward Novel Coronavirus 2019 (COVID-19)”. This is a cross-sectional study aiming to investigate the knowledge, attitude and practice of Emergency Physicians in the Major hospitals of Bahrain towards COVID-19. Information obtained through this study will remain confidential and will be used only for scientific purposes. Your participation will remain anonymous.

Thank you for your participation in our study, it will take you around 10- 12 minutes to complete the questionnaire.

For any enquiries, please don't hesitate to contact us on the following email

salah.alghanem@gmail.com.

Consent

By clicking “I agree” below you are indicating that you are at least 18 years old, have read and understood this consent form and agree to participate in this study.

- I agree
- I disagree

Part I: (Personal Characteristics & Qualification):

1. Age:

- Under 25
- 25 – 34
- 35 – 44
- 45 – 54
- 55 – 64
- 65 and above

2. Gender:

- Male
- Female

3. Marital status:

- Single
- Married
- Divorced
- Widow/widower

4. Do you have Children:

- No
- Yes

5. Nationality:

- Bahraini
- Non-Bahraini

6. Organization:

- SMC
- BDF
- KHUH
- Others (please specify)__________________

7. Position:

- Residency Training Program (Level ________)
- Service Resident
- Chief Resident
- Specialist in EM
- Consultant in EM
- Other_________________

8. Qualifications: (tick all that apply)

- MBBS or MD
- Master’s degree
- Board Certified in EM
- Fellowship in EM
- Other_______________

9. Experience in Emergency Medicine:

- < 5 years
- 5 years

10. Did you attend (in person/online) any CPD activity about COVID-19?

- YES
- NO
- Not sure

11. Source of Knowledge about COVID-19? (Tick all that apply)

- Organization circulars/guidelines
- Journals
- Online websites
- Social Media
- Others_________________

Part II: (Knowledge Statements about COVID-19)

1. COVID-19 is an Airborne infection.

- YES
- NO
- Not sure

2. The most common presenting symptoms are Fever & Cough.

- YES
- NO
- Not sure

3. The Incubation period for COVID-19 is between 1-14 days.

- YES
- NO
- Not sure

4. Asymptomatic carriage and transmission have been reported.

- YES
- NO
- Not sure

5. Who are at higher risk for severe form of COVID-19? (Tick all that apply)

- Pts on steroids
- Cancer patients
- Children
- Asthmatic patients

6. Any traveler must be isolated (Home/Institutional) for 14 days even if the

COVID-19 test was negative.

- YES
- NO
- Not sure

7. Physical Exam findings are non-specific and similar to those of other

viral illnesses.

- YES
- NO
- Not sure

8. The COVID-19 is thought to have a zoonotic origin.

- YES
- NO
- Not sure

9. Suspected cases in the ED should be isolated and have nasopharyngeal

swab performed.

- YES
- NO
- Not sure

10. COVID-19 is commonly seen among children.

- YES
- NO
- Not sure

11. Positive COVID-19 patients are contagious even if they are asymptomatic.

- YES
- NO
- Not sure

12. Leukopenia and elevated CPK are associated with poor outcomes among cases of COVID-19.

- YES
- NO
- Not sure

13. Vomiting and diarrhea could be the presenting complains of patients with COVID 19.

- YES
- NO
- Not sure

14. No need to repeat the COVID-19 test after 14 days of isolation (Home/Institutional) for high risk cases with negative initial COVID-19 testing.

- YES
- NO
- Not sure

15. The virus responsible for COVID-19 is SARS-CoV-2.

- YES
- NO
- Not sure

Part III: (Attitude Statements about COVID-19)

|  | Strongly  disagree | Disagree | Neither  agree nor  disagree | Agree | Strongly  Agree |
| --- | --- | --- | --- | --- | --- |
| I would like to attend any  COVID-19 CPD activity | 1 | 2 | 3 | 4 | 5 |
| I would provide care for  a patient with COVID-19 | 1 | 2 | 3 | 4 | 5 |
| I am worried about  contracting COVID-19  from a patient | 1 | 2 | 3 | 4 | 5 |
| I would provide CPR to a  COVID-19 patient even  without PPE | 1 | 2 | 3 | 4 | 5 |
| I am afraid to put my  family at risk, when I  provide care to a  COVID-19 patient | 1 | 2 | 3 | 4 | 5 |
| I would be willing to be a  volunteer in COVID-19  vaccine trial | 1 | 2 | 3 | 4 | 5 |
| I would encourage  family members and  friends to be a volunteer  in COVID-19 vaccine  trials | 1 | 2 | 3 | 4 | 5 |
| I would be willing to  work in COVID-19  treatment/isolation center | 1 | 2 | 3 | 4 | 5 |
| I would encourage  family member or friends  to be a volunteer in a  COVID-19 campaign | 1 | 2 | 3 | 4 | 5 |
| Not to provide care to a  patient with COVID-19  is not Ethical. | 1 | 2 | 3 | 4 | 5 |

Part IV: (Practice Statements about COVID-19)

1. Did you read the local guidelines about COVID-19?

- YES
- NO
- Not sure

2. You should wash your hands before seeing a suspected case of COVID-19.

- YES
- NO
- Not sure

3. You should wear the following all the time in the Emergency Department. (Tick all that apply)

- Gloves
- Goggles
- Surgical mask
- N95 mask
- Cap
- Shoe Cover
- Gown

4. Personal Protective Equipment (PPE) to be used when dealing with suspected cases of COVID-19: (Tick all that apply)

- Gloves
- Goggles
- Surgical mask
- N95 mask
- Cap
- Shoe Cover
- Gown

5. Most important standard precaution that should be applied when dealing with a case of COVID-19.

- Taking Antibiotics
- Drinking warm fluids
- Hand washing

6. Most important respiratory precaution to prevent transmission of COVID-19 in the ED is: (Tick all that apply)

- Gloves
- Goggles
- Mask
- Isolation

7. What to do after exiting from the room of a COVID-19 patient?

- Remove and discard PPE
- Make sure to keep PPE

8. What should be done after discharge of a suspected COVID-19 patient? (Tick all that apply)

- Cleaning and disinfecting all surfaces that were in contact with the

patient or may have become contaminated.

- Privacy curtains should be removed, placed in a bag and transported to

be laundered.

- Burning all patient’s cloths, curtains and coverings.

9. Patients with COVID-19 should be placed in a room with:

- Negative pressure
- Positive pressure
- Normal single room

10. The preferred method for intubating Patients with COVID-19.

- Use standard Laryngoscope
- Use Video Laryngoscope

11. In what order should you put on the PPEs.

- Gloves
- Goggles
- Mask
- Cap
- Shoe Cover
- Gown

___________Thank you for your participation___________
